# Supplementary material
Source: publisher site journal article supplement (https://www.dovepress.com/article/488400)

**Figure S1.** Hierarchical cluster analysis graph.


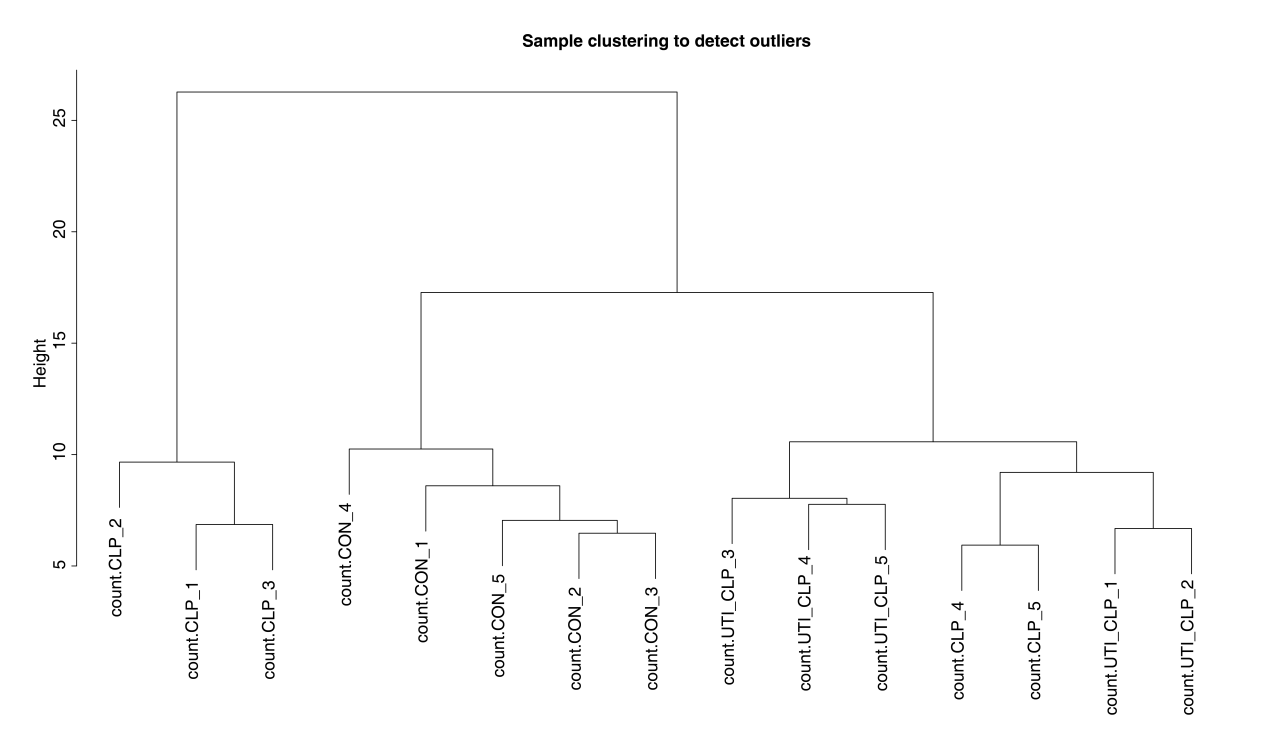

Supplement: Supplementary file 1 [file get_supplementary_file.php]
